# Supplementary material for: FAM76B regulates NF-κB-mediated inflammatory pathway by influencing the translocation of hnRNPA2B1
Source: eLife journal article supplement (doi:10.7554/elife.85659), 2023-08-10
Supplement: fig4-data1 [file elife-85659-fig4-data1-v2.zip]

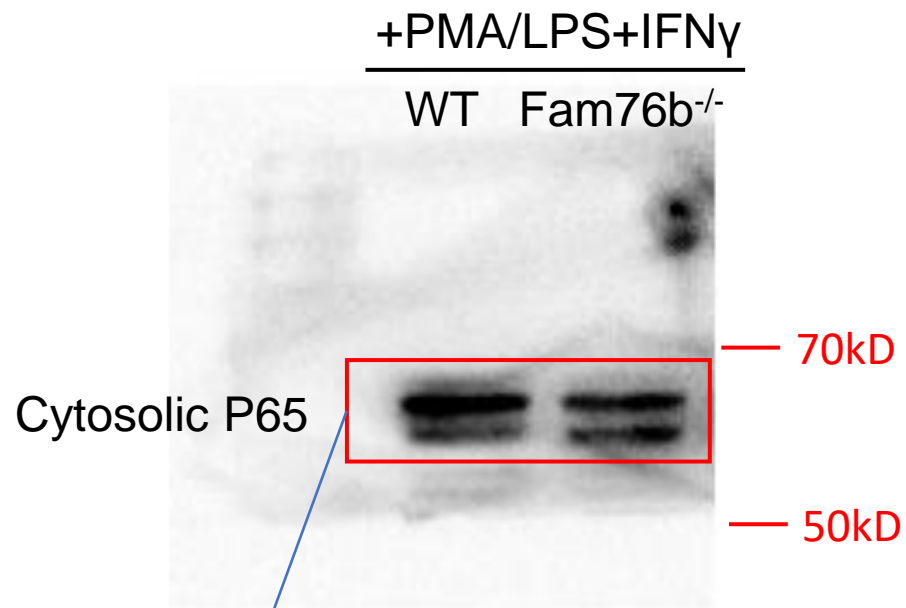

This lane corresponds to the band (Cytosolic P65) of Figure 4i in the cropped images within the manuscript.

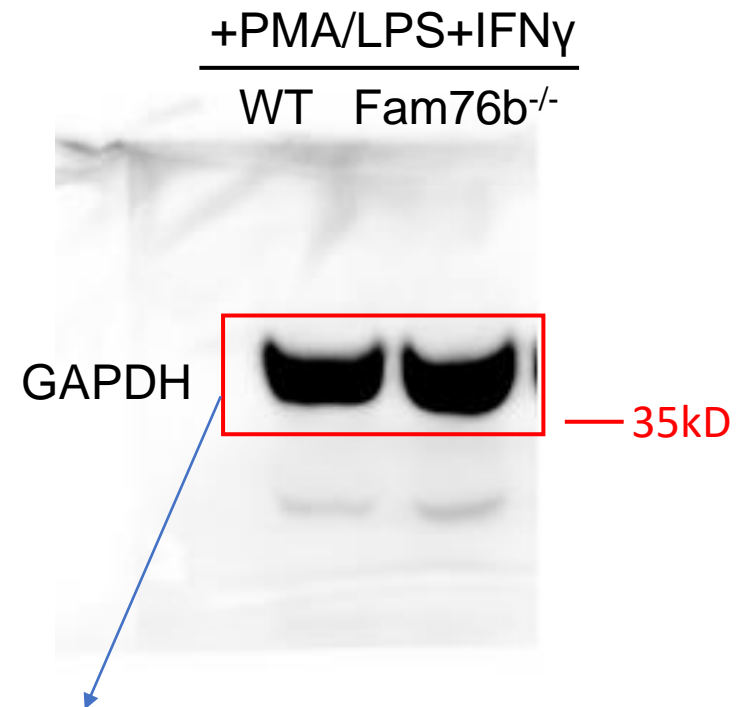

This lane corresponds to the band (GAPDH) of Figure 4i in the cropped images within the manuscript.

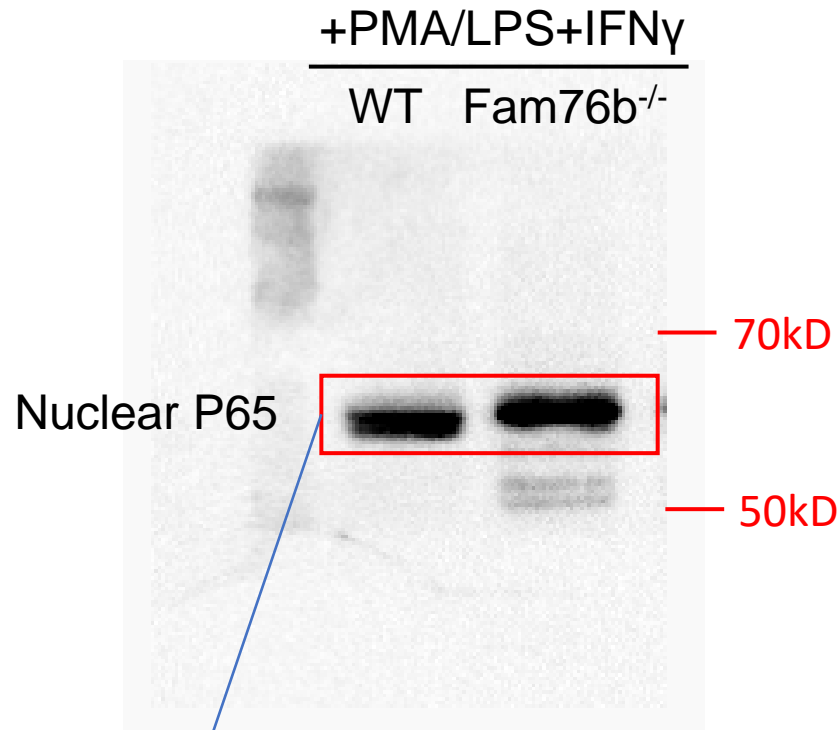

This lane corresponds to the band (Nuclear P65) of Figure 4i in the cropped images within the manuscript.

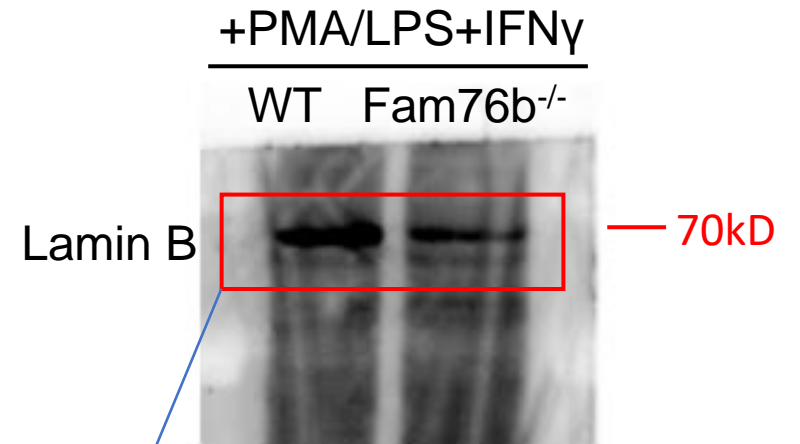

This lane corresponds to the band (Lamin B) of Figure 4i in the cropped images within the manuscript.
