# Supplementary material for: FAM76B regulates NF-κB-mediated inflammatory pathway by influencing the translocation of hnRNPA2B1
Source: eLife journal article supplement (doi:10.7554/elife.85659), 2023-08-10
Supplement: fig4-data1 [file elife-85659-fig4-data1-v2.zip]

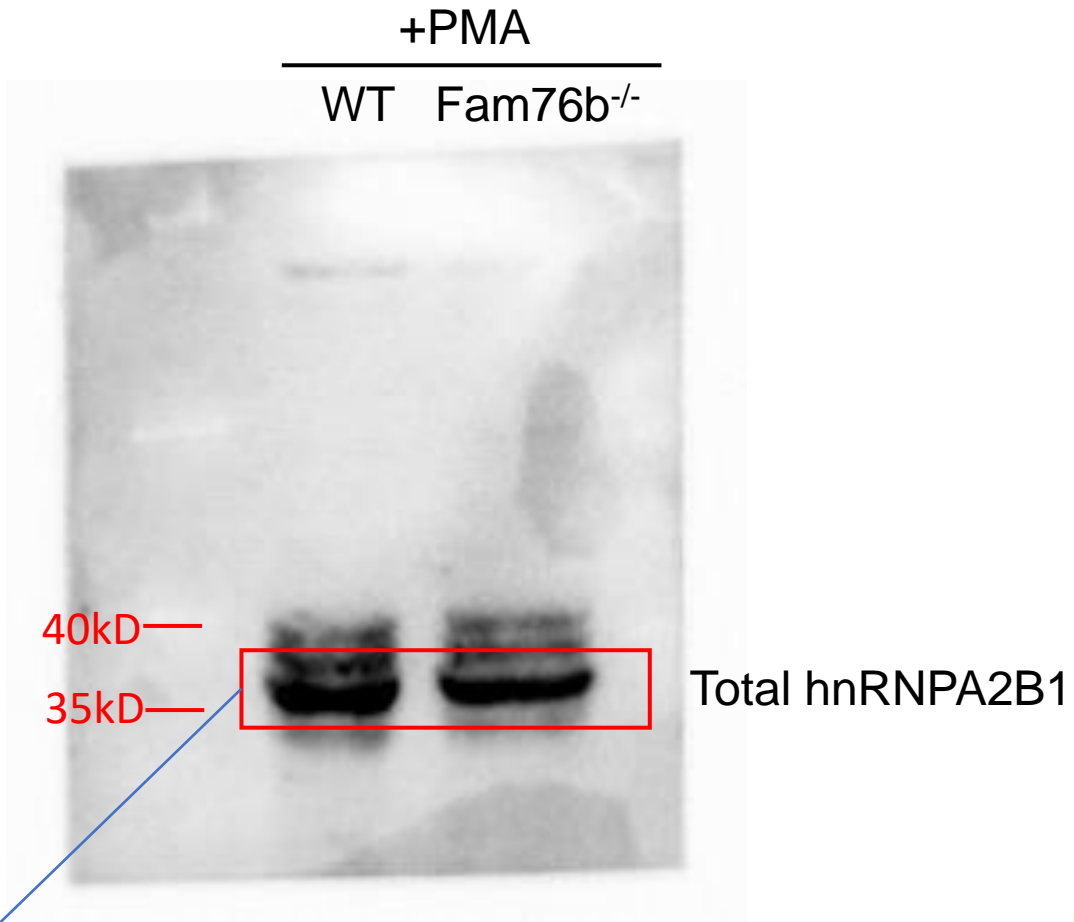

This lane corresponds to the band (Total hnRNPA2B1) of Figure 4b in the cropped images within the manuscript.

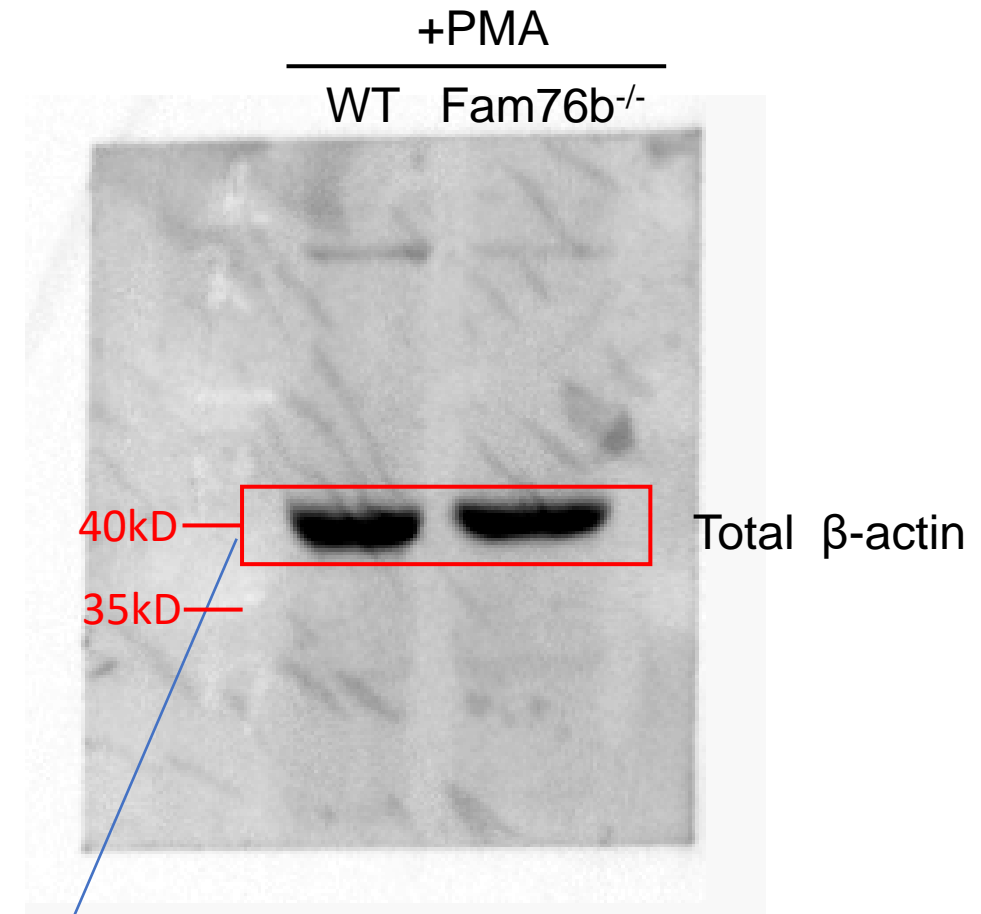

This lane corresponds to the band (Total  $\beta$ -actin) of Figure 4b in the cropped images within the manuscript.

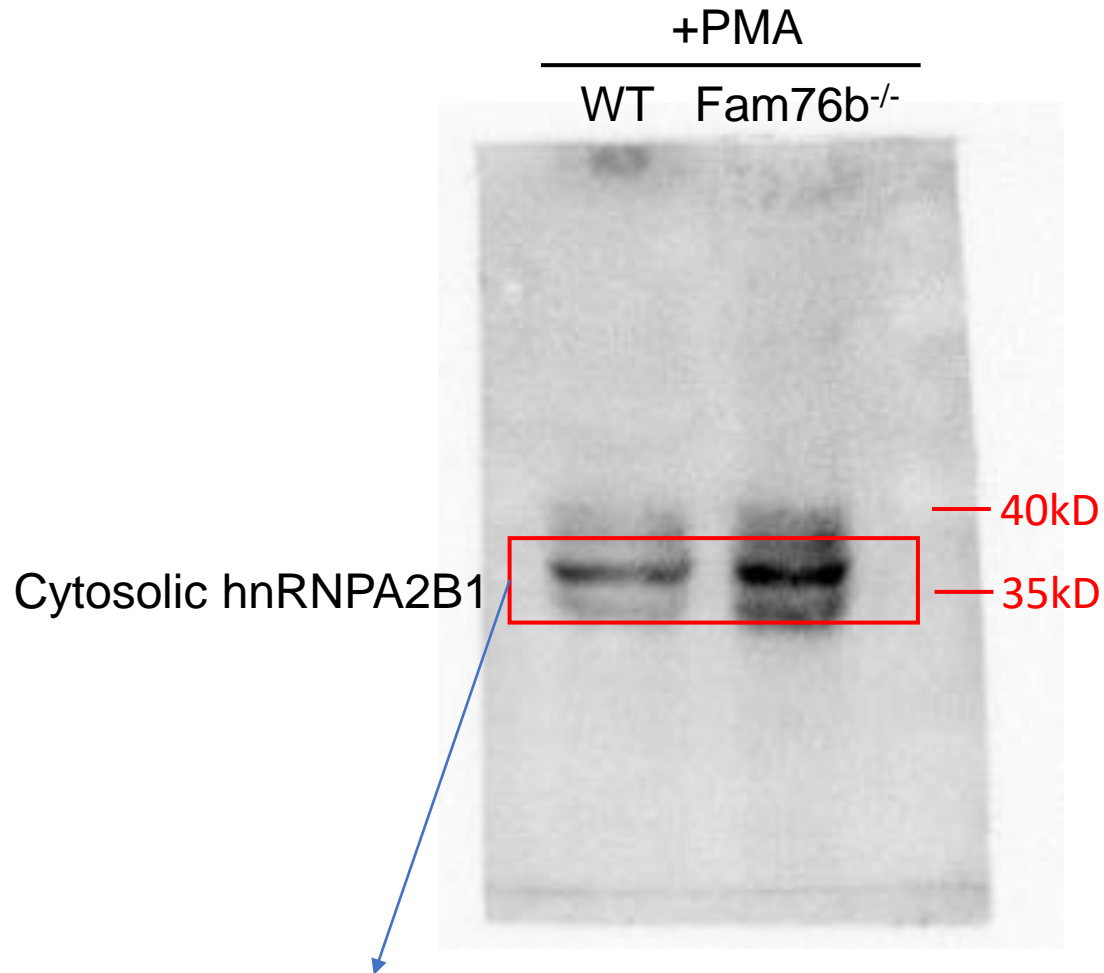

This lane corresponds to the band (Cytosolic hnRNPA2B1) of Figure 4b in the cropped images within the manuscript.

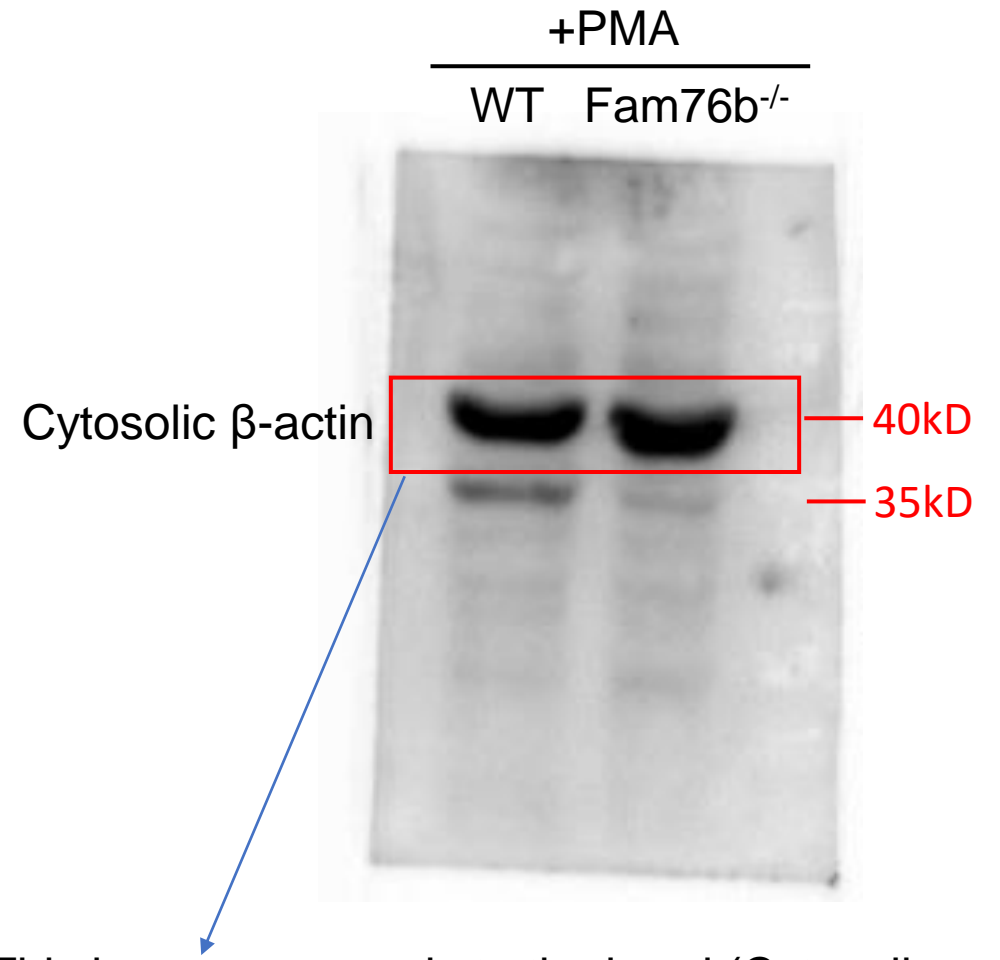

This lane corresponds to the band (Cytosolic  $\beta$ -actin) of Figure 4b in the cropped images within the manuscript.

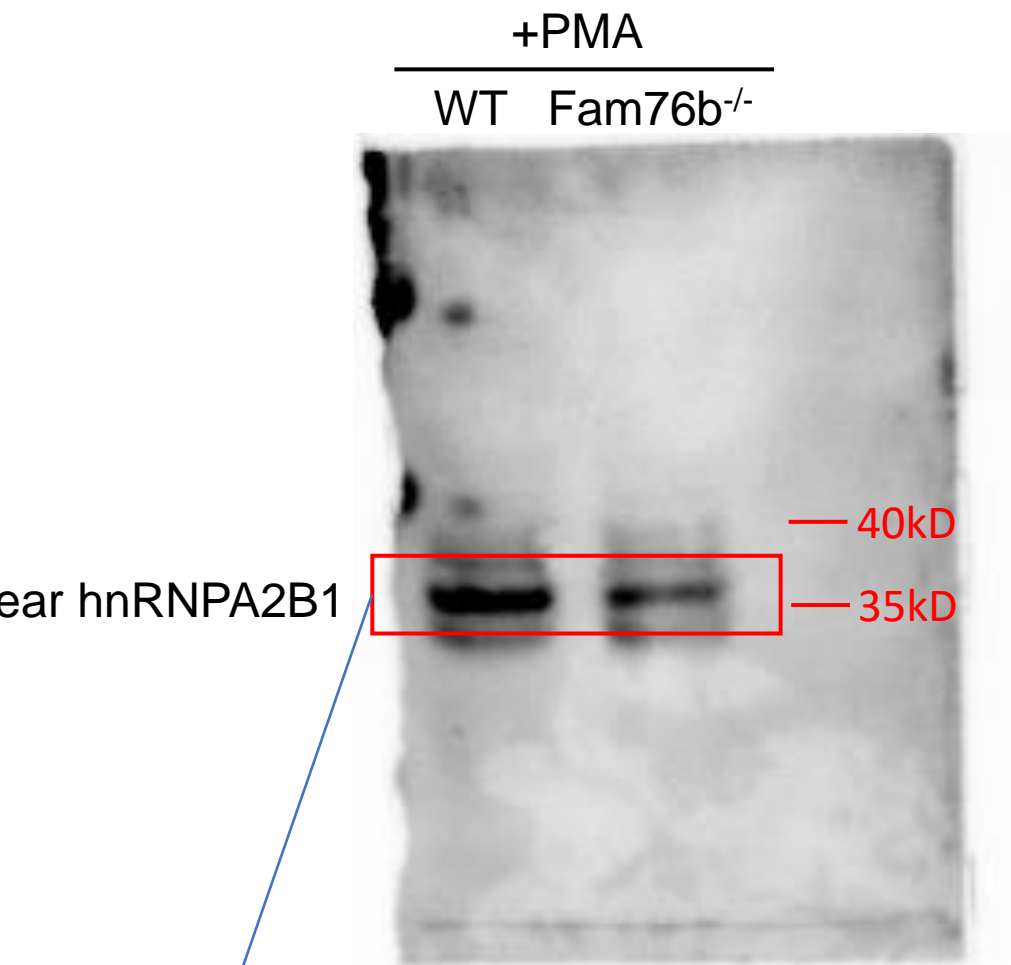

lane corresponds to the band  
(near hnRNPA2B1) of Figure 4b in the  
cropped images within the manuscript.

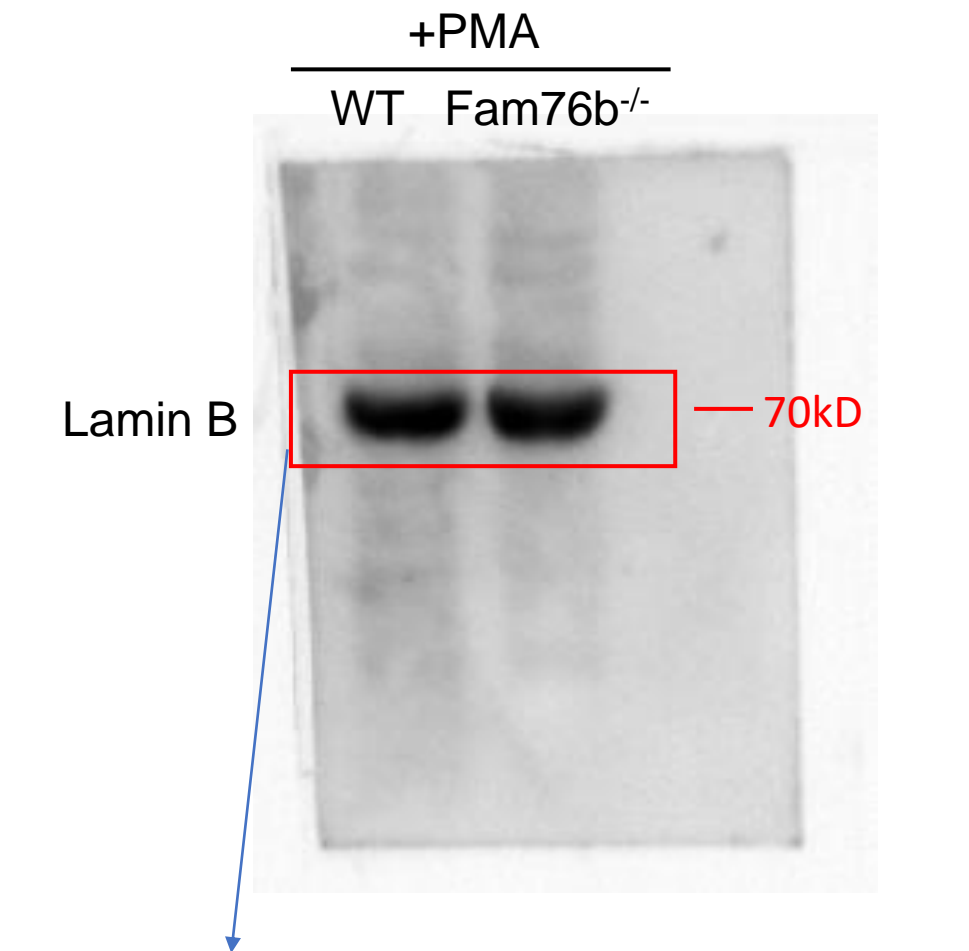

This lane corresponds to the band (Lamin B)  
of Figure 4b in the cropped images within  
the manuscript.
