# Supplementary material for: FAM76B regulates NF-κB-mediated inflammatory pathway by influencing the translocation of hnRNPA2B1
Source: eLife journal article supplement (doi:10.7554/elife.85659), 2023-08-10
Supplement: fig4-figsupp1-data1 [file elife-85659-fig4-figsupp1-data1-v2.pdf]

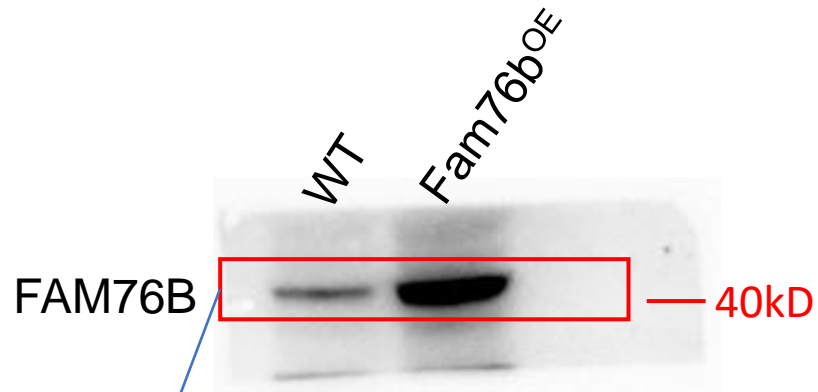

This lane corresponds to the band (FAM76B) of Figure 4-figure supplement 1a in the cropped images within the manuscript.

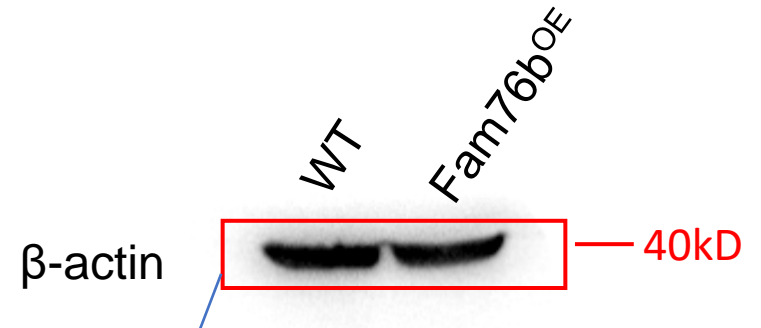

This lane corresponds to the band ( $\beta$ -actin) of Figure 4-figure supplement 1a in the cropped images within the manuscript.
