# Supplementary material for: FAM76B regulates NF-κB-mediated inflammatory pathway by influencing the translocation of hnRNPA2B1
Source: eLife journal article supplement (doi:10.7554/elife.85659), 2023-08-10

# Full unedited gel for Figure.5c

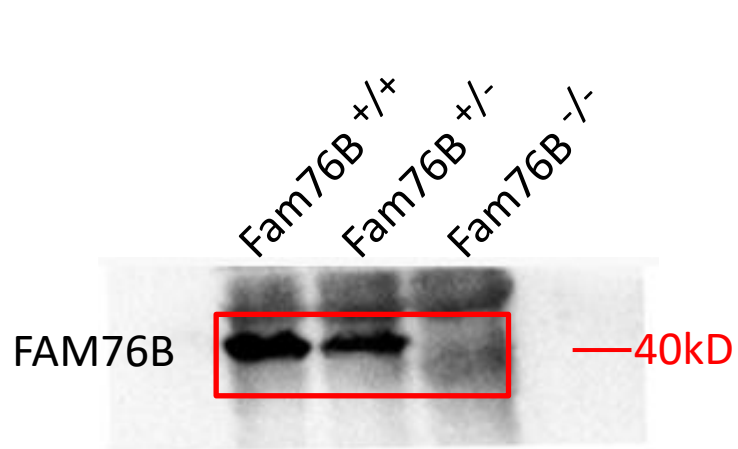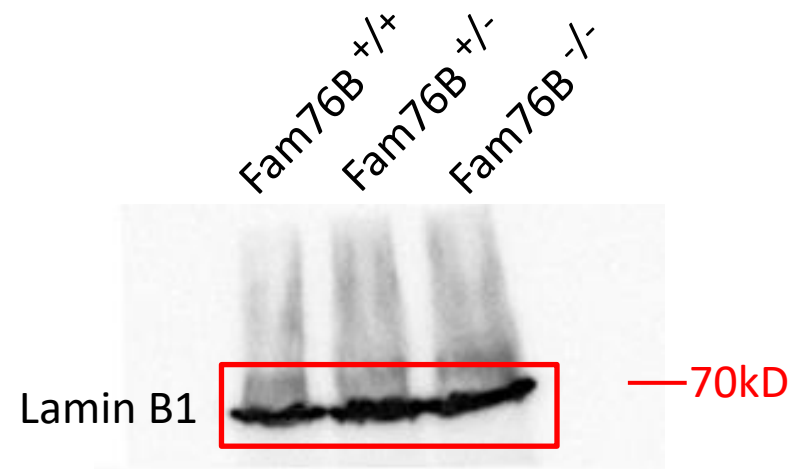

Supplement: fig5-data1 [file elife-85659-fig5-data1-v2.pdf]
