# Supplementary material for: FAM76B regulates NF-κB-mediated inflammatory pathway by influencing the translocation of hnRNPA2B1
Source: eLife journal article supplement (doi:10.7554/elife.85659), 2023-08-10
Supplement: supp [file elife-85659-supp-v1.zip]

## Full unedited gel for Figure.3e

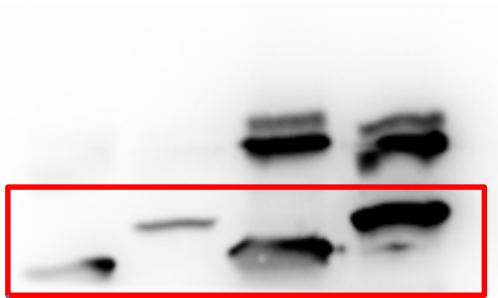

This lane corresponds to the band blotted with anti-Flag of Figure 3e in the cropped images within the manuscript.

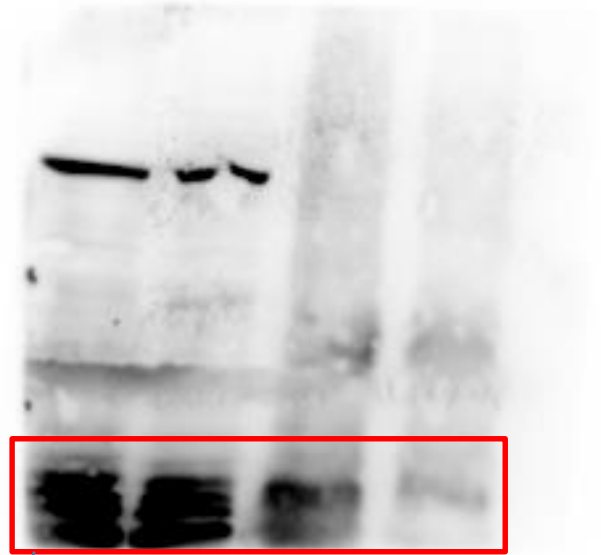

This lane corresponds to the band blotted with anti-hnRNPA2B1 of Figure 3e in the cropped images within the manuscript.
