# Supplementary material for: FAM76B regulates NF-κB-mediated inflammatory pathway by influencing the translocation of hnRNPA2B1
Source: eLife journal article supplement (doi:10.7554/elife.85659), 2023-08-10
Supplement: supp [file elife-85659-supp-v1.zip]

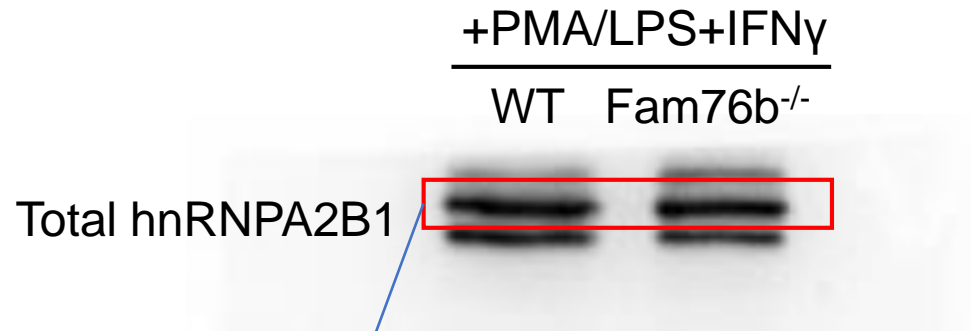

This lane corresponds to the band (Total hnRNPA2B1) of Figure 4e in the cropped images within the manuscript.

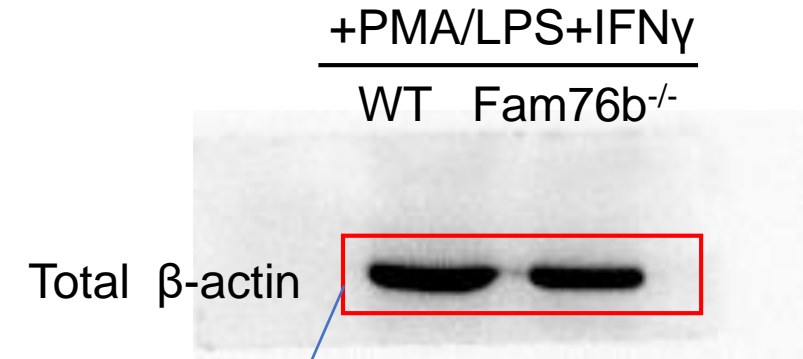

This lane corresponds to the band (Total  $\beta$ -actin) of Figure 4e in the cropped images within the manuscript.

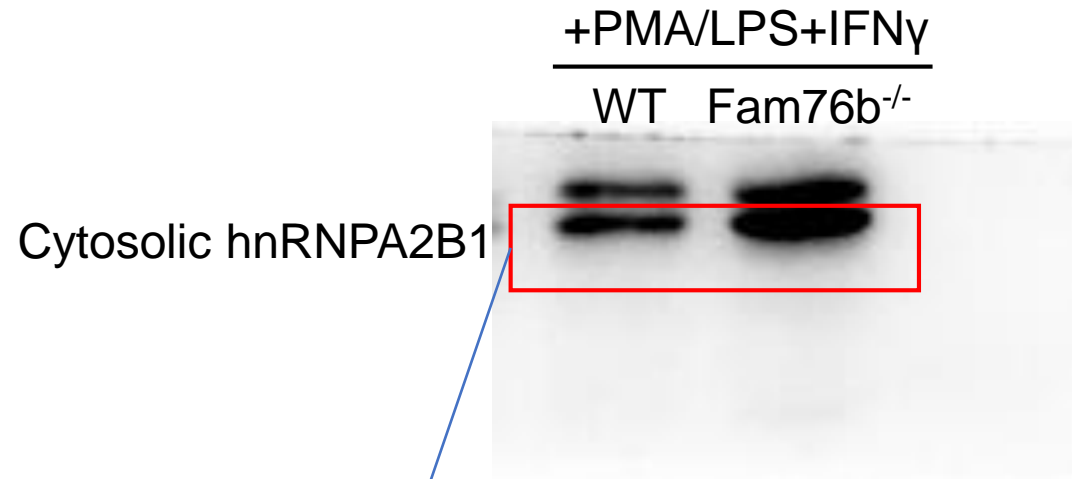

This lane corresponds to the band (Cytosolic hnRNPA2B1) of Figure 4e in the cropped images within the manuscript.

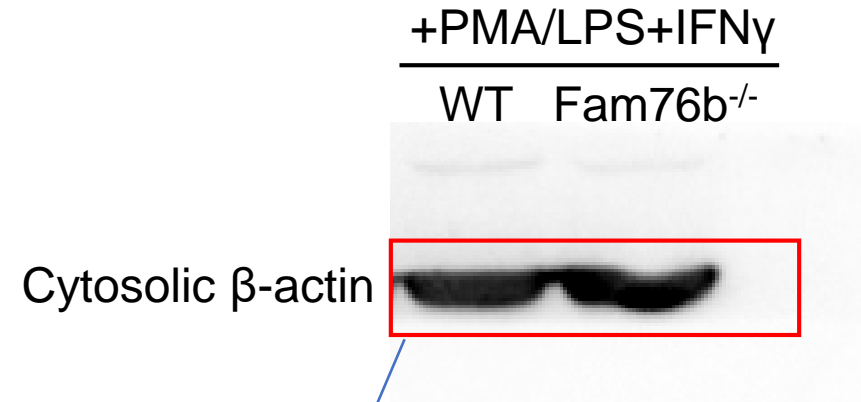

This lane corresponds to the band (Cytosolic  $\beta$ -actin) of Figure 4e in the cropped images within the manuscript.

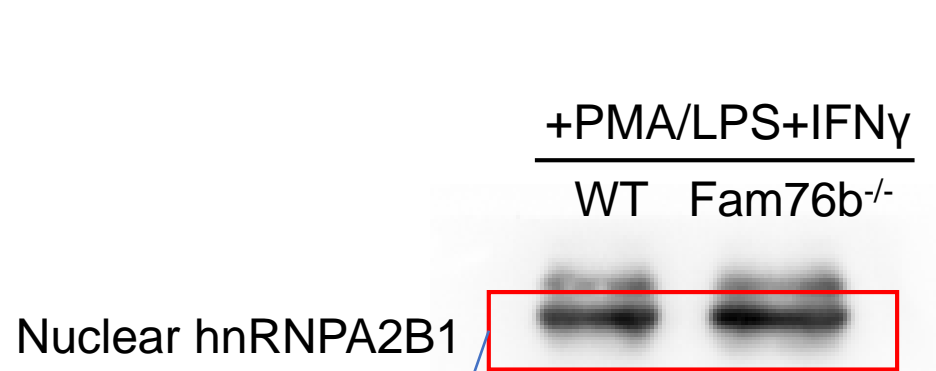

This lane corresponds to the band (Nuclear hnRNPA2B1) of Figure 4e in the cropped images within the manuscript.

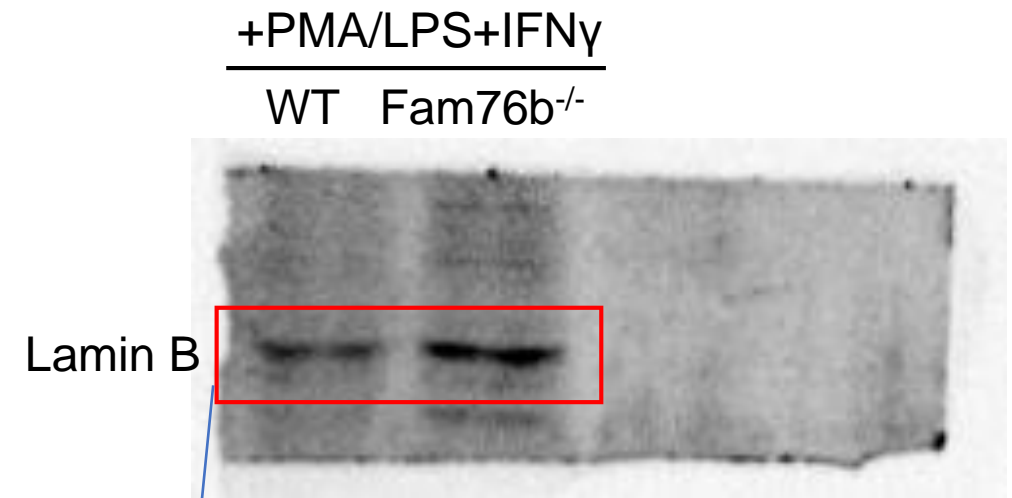

This lane corresponds to the band (Lamin B) of Figure 4e in the cropped images within the manuscript.
