# Supplementary material for: FAM76B regulates NF-κB-mediated inflammatory pathway by influencing the translocation of hnRNPA2B1
Source: eLife journal article supplement (doi:10.7554/elife.85659), 2023-08-10
Supplement: supp [file elife-85659-supp-v1.zip]

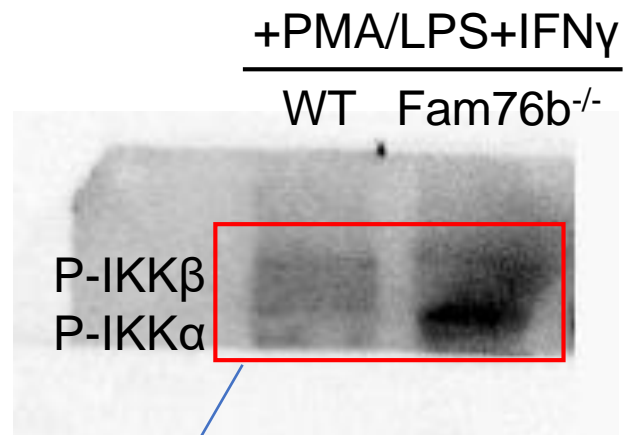

This lane corresponds to the band (P-IKK  $\beta$  and P-IKK $\alpha$ ) of Figure 4g in the cropped images within the manuscript.

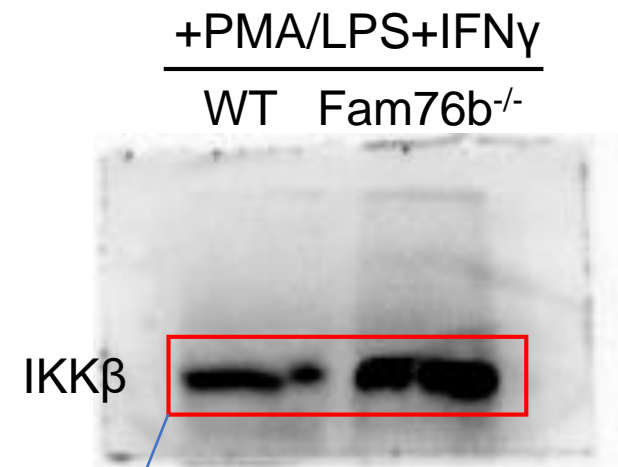

This lane corresponds to the band (IKK $\beta$ ) of Figure 4g in the cropped images within the manuscript.

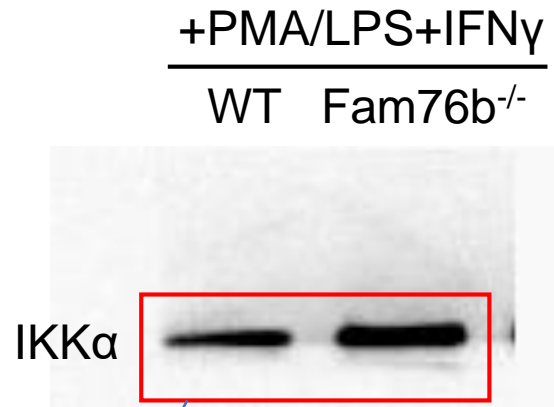

This lane corresponds to the band (IKK $\alpha$ ) of Figure 4g in the cropped images within the manuscript.

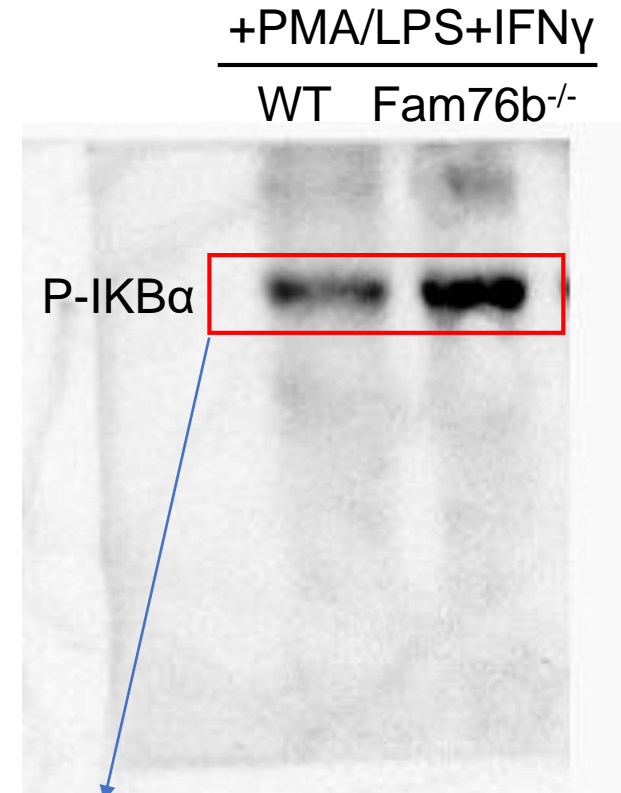

This lane corresponds to the band (P-IKB $\alpha$ ) of Figure 4g in the cropped images within the manuscript.

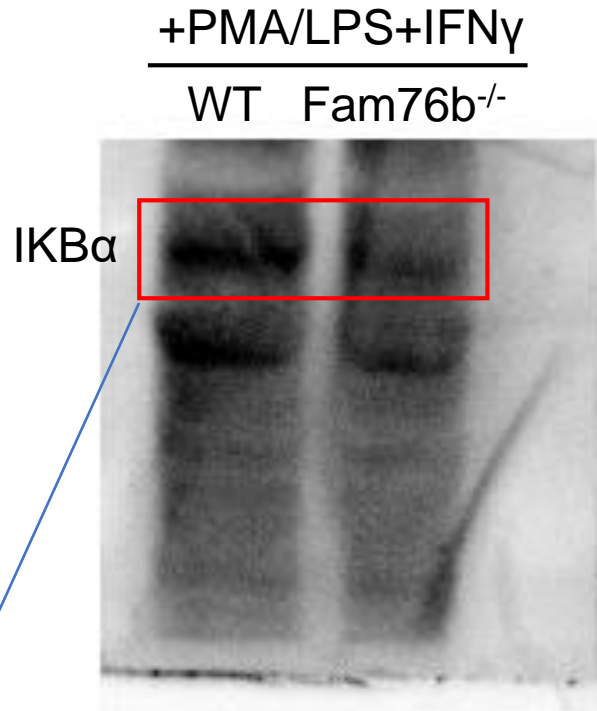

This lane corresponds to the band (IKB $\alpha$ ) of Figure 4g in the cropped images within the manuscript.

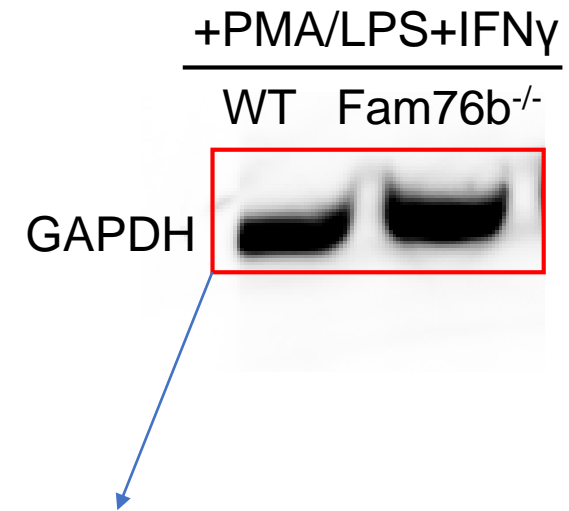

This lane corresponds to the band (GAPDH) of Figure 4g in the cropped images within the manuscript.
