# Supplementary material for: FAM76B regulates NF-κB-mediated inflammatory pathway by influencing the translocation of hnRNPA2B1
Source: eLife journal article supplement (doi:10.7554/elife.85659), 2023-08-10
Supplement: supp [file elife-85659-supp-v1.zip]

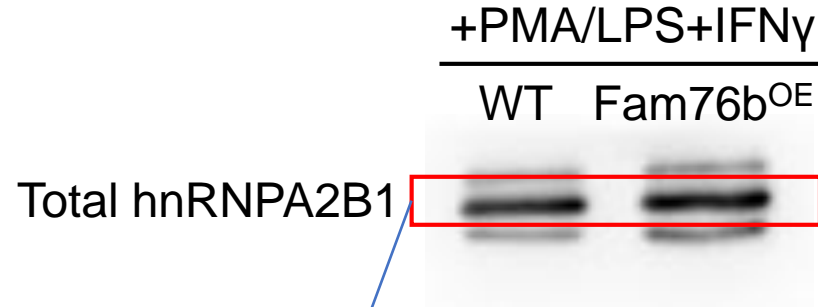

This lane corresponds to the band (Total hnRNPA2B1) of Figure 4-figure supplement 3b in the cropped images within the manuscript.

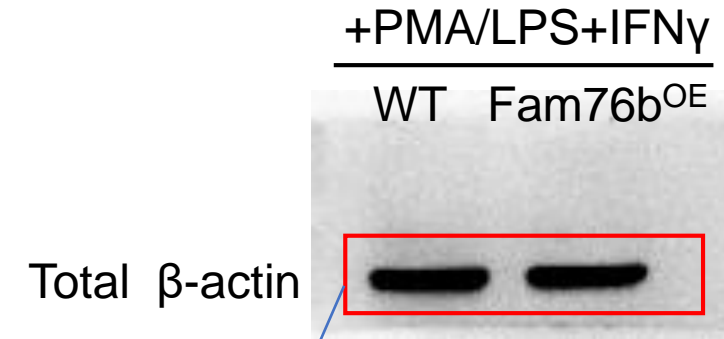

This lane corresponds to the band (Total  $\beta$ -actin) of Figure 4-figure supplement 3b in the cropped images within the manuscript.

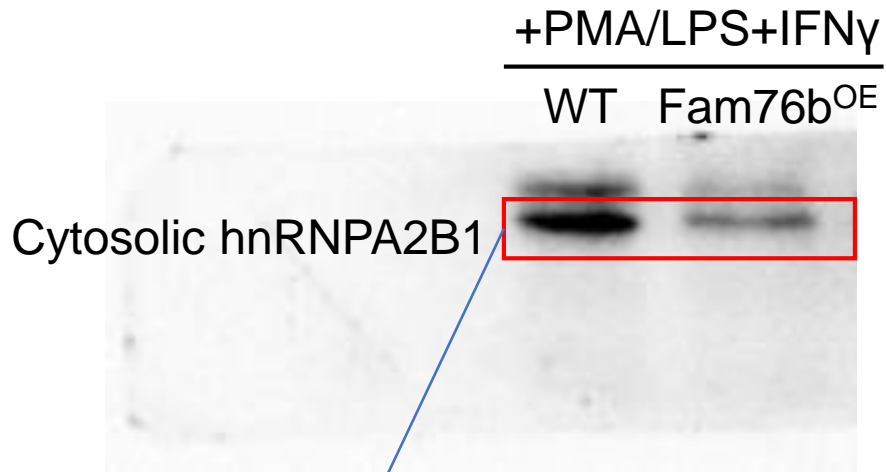

This lane corresponds to the band (Cytosolic hnRNPA2B1) of Figure 4-figure supplement 3b in the cropped images within the manuscript.

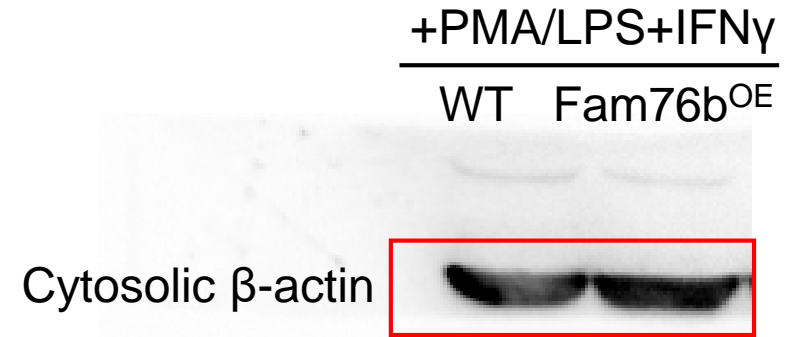

This lane corresponds to the band (Cytosolic  $\beta$ -actin) of Figure 4-figure supplement 3b in the cropped images within the manuscript.

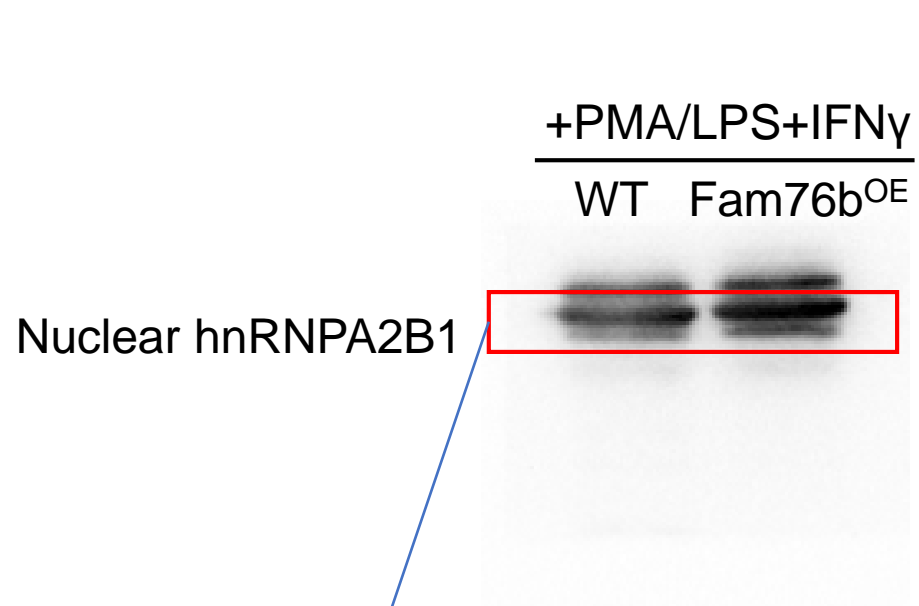

This lane corresponds to the band (Nuclear hnRNPA2B1) of Figure 4-figure supplement 3b in the cropped images within the manuscript.

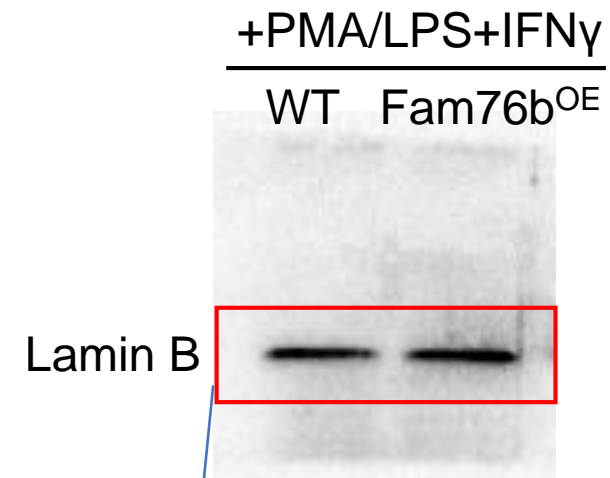

This lane corresponds to the band (Lamin B) of Figure 4-figure supplement 3b in the cropped images within the manuscript.
