# Supplementary figures and images for: FAM76B regulates NF-κB-mediated inflammatory pathway by influencing the translocation of hnRNPA2B1
Source: eLife journal article supplement (doi:10.7554/elife.85659), 2023-08-10

## Full unedited gel for Figure.1a

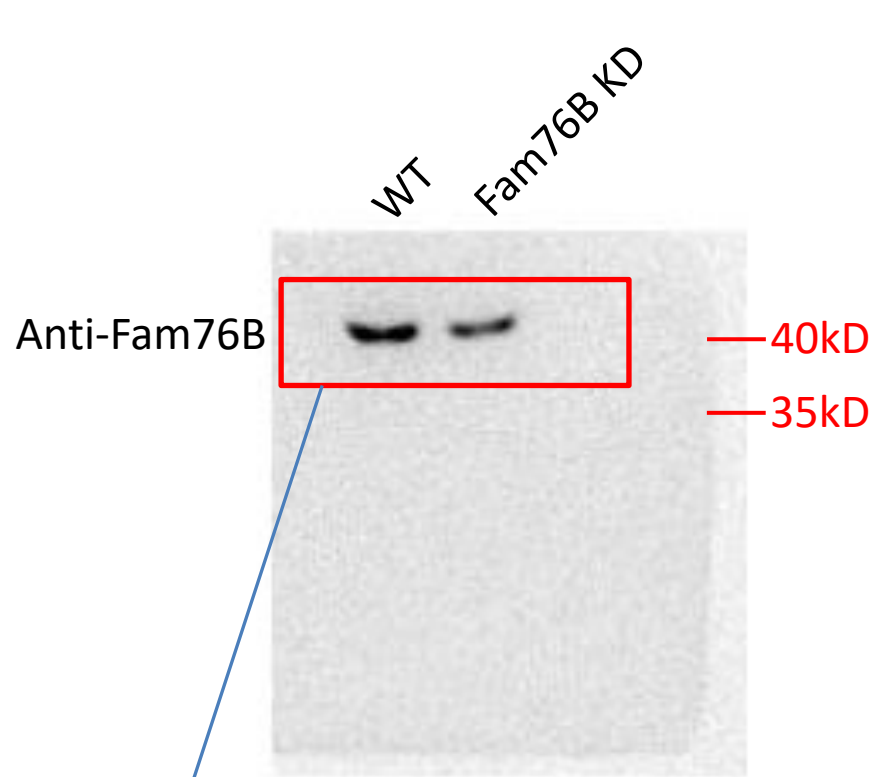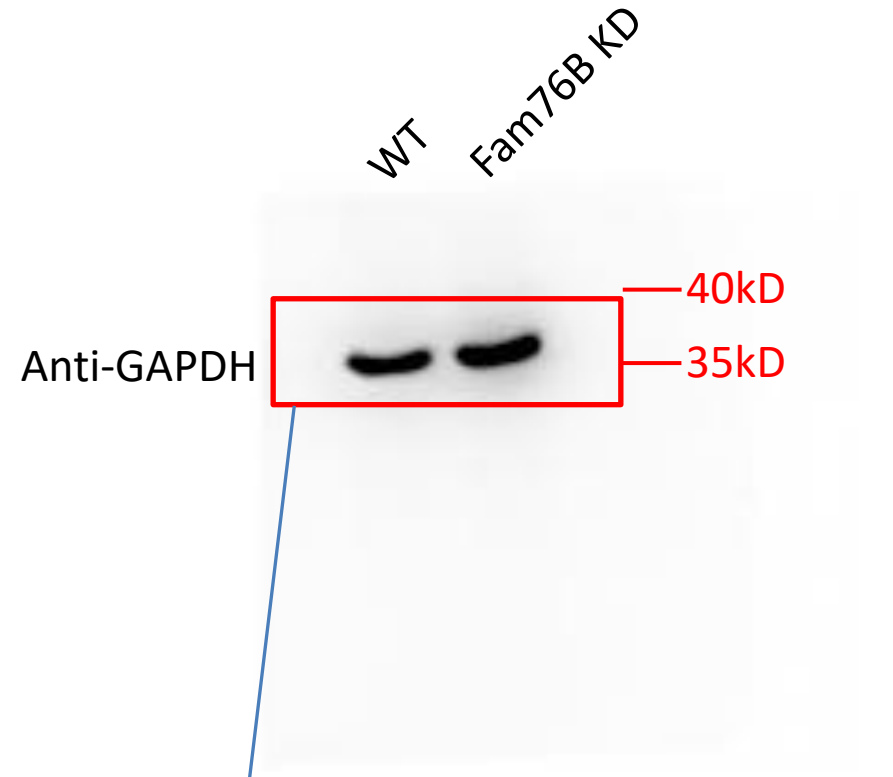

Supplement: fig1-data1 [file elife-85659-fig1-data1-v2.zip]

## Full unedited gel for Figure.3d

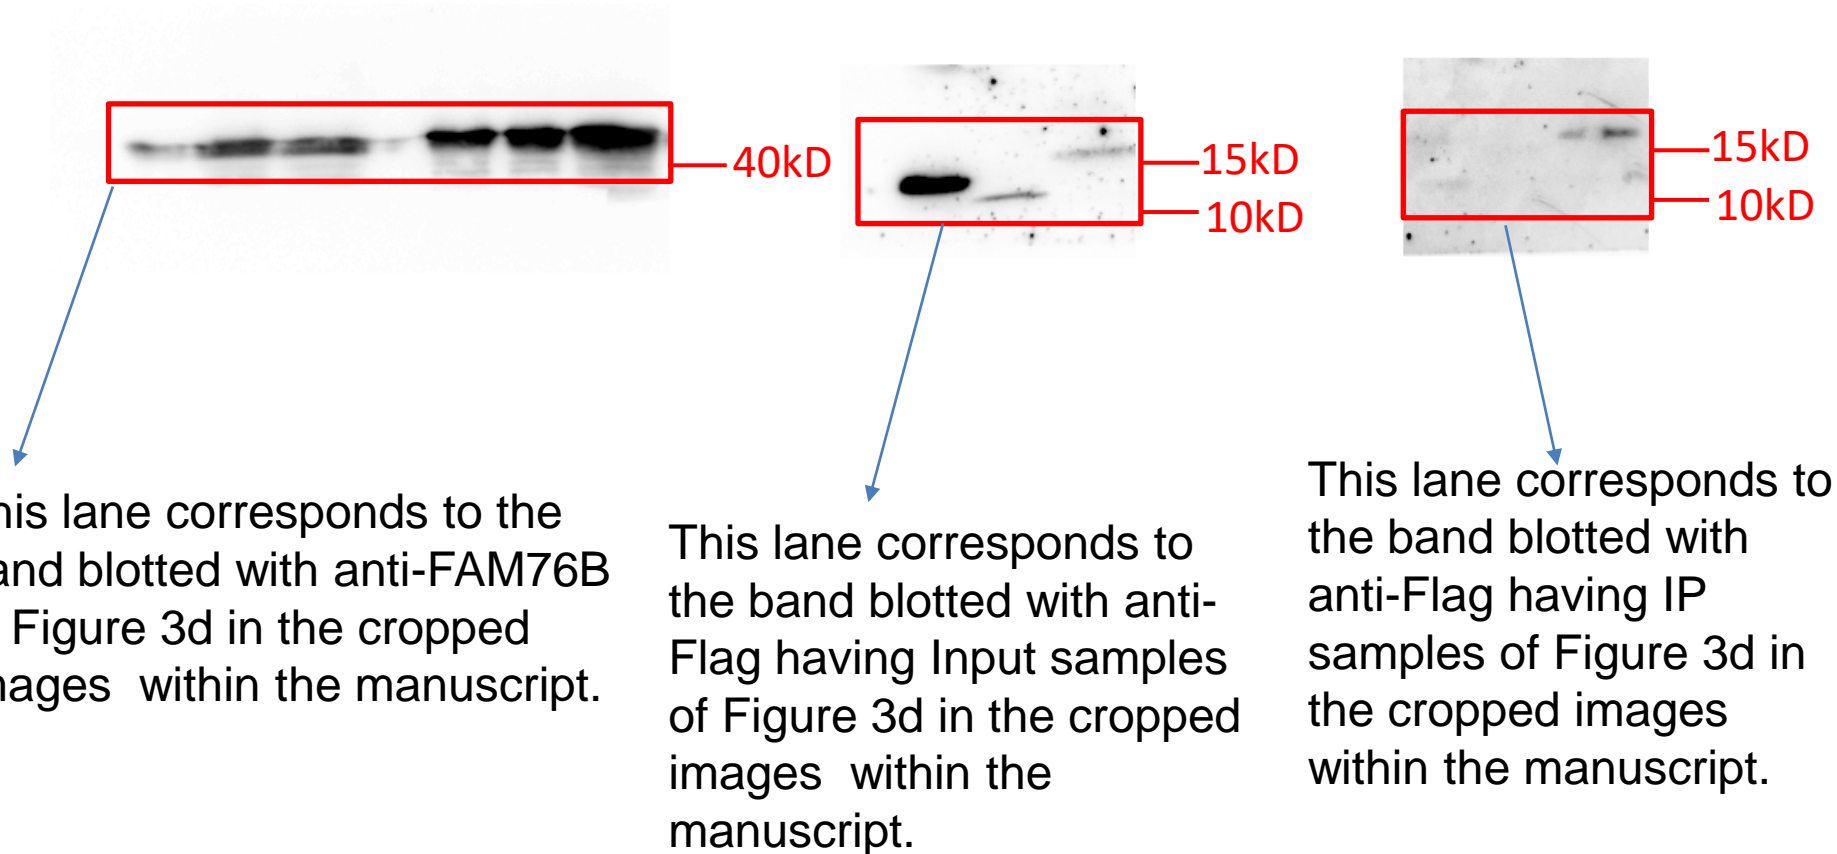

Supplement: fig3-data1 [file elife-85659-fig3-data1-v2.zip]

# Full unedited gel for Figure.5c

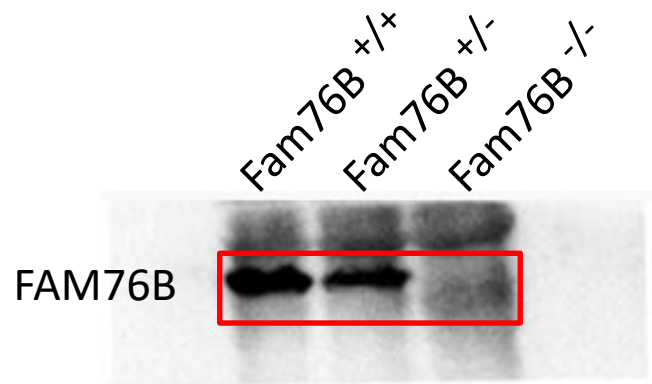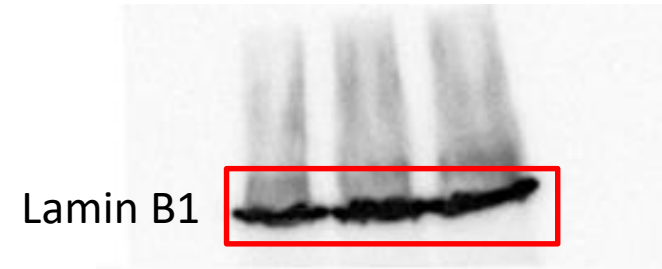

Supplement: supp [file elife-85659-supp-v1.zip]
